# Supplementary material
Source: PubMed Central journal article supplement (PMC4146736)
Supplement: NIHMS606296-supplement-Supplemental_Material.pdf [file NIHMS606296-supplement-Supplemental_Material.pdf]

## **Supplemental Material**

**Are Hemodynamics Surrogate Endpoints in Pulmonary Arterial Hypertension?**

**Supplemental Table 1. Criteria to establish the change in a hemodynamic measure ( $\Delta$ HHD) as a mediator in the relationship between treatment assignment and clinical events at 12 weeks in the subgroup of patients with idiopathic pulmonary arterial hypertension.**

|                                                                                                                                                            | Hemodynamic measure                                                                         |                                                                                             |                                                                                             |                                                                                                            |                                                                                                  |                                                                                                |
|------------------------------------------------------------------------------------------------------------------------------------------------------------|---------------------------------------------------------------------------------------------|---------------------------------------------------------------------------------------------|---------------------------------------------------------------------------------------------|------------------------------------------------------------------------------------------------------------|--------------------------------------------------------------------------------------------------|------------------------------------------------------------------------------------------------|
|                                                                                                                                                            | $\Delta$ RAP                                                                                | $\Delta$ mPAP                                                                               | $\Delta$ CO                                                                                 | $\Delta$ CI                                                                                                | $\Delta$ PVR                                                                                     | $\Delta$ PA Compliance                                                                         |
| 1. Treatment assignment has a significant effect on $\Delta$ HHD                                                                                           | Mean difference (95% CI) between treatment and placebo -1.9 mm Hg (-2.8, -1.1)<br>p < 0.001 | Mean difference (95% CI) between treatment and placebo -2.5 mm Hg (-4.0, -1.1)<br>p < 0.001 | Mean difference (95% CI) between treatment and placebo 0.40 L/min (0.21, 0.58)<br>p < 0.001 | Mean difference (95% CI) between treatment and placebo 0.22 L/min/m <sup>2</sup> (0.12, 0.32)<br>p < 0.001 | Mean difference (95% CI) between treatment and placebo -2.3 Wood units (-3.1, -1.4)<br>p < 0.001 | Mean difference (95% CI) between treatment and placebo 0.21 mL/mm Hg (0.12, 0.30)<br>p < 0.001 |
| 2. $\Delta$ HHD has a significant effect on the odds of a clinical event                                                                                   | OR (95% CI) per 1 mm Hg increase 1.08 (1.02, 1.16)<br>p = 0.011                             | OR (95% CI) per 1 mm Hg increase 1.01 (0.97, 1.06)<br>p = 0.494                             | OR (95% CI) per 1 L/min increase 0.66 (0.45, 0.98)<br>p = 0.033                             | OR (95% CI) per 1 L/min/m <sup>2</sup> unit increase 0.46 (0.23, 0.95)<br>p = 0.031                        | OR (95% CI) per 1 Wood unit increase 1.04 (0.98, 1.10)<br>p = 0.186                              | OR (95% CI) per 1 mL/mmHg increase 0.63 (0.29, 1.36)<br>p = 0.240                              |
| 3. Treatment assignment has a significant effect on the odds of a clinical event                                                                           | OR (95% CI) for treatment vs. placebo 0.40 (0.22, 0.72)<br>p = 0.002                        | OR (95% CI) for treatment vs. placebo 0.41 (0.23, 0.74)<br>p = 0.003                        | OR (95% CI) for treatment vs. placebo 0.43 (0.24, 0.76)<br>p = 0.004                        | OR (95% CI) for treatment vs. placebo 0.43 (0.24, 0.76)<br>p = 0.004                                       | OR (95% CI) for treatment vs. placebo 0.45 (0.25, 0.82)<br>p = 0.009                             | OR (95% CI) for treatment vs. placebo 0.43 (0.24, 0.77)<br>p = 0.004                           |
| 4. The effect of treatment assignment on the odds of a clinical event is attenuated with the addition of $\Delta$ HHD to the model (compare with #3 above) | OR (95% CI) for treatment vs. placebo 0.45 (0.25, 0.81)<br>p = 0.008                        | OR (95% CI) for treatment vs. placebo 0.42 (0.24, 0.75)<br>p = 0.004                        | OR (95% CI) for treatment vs. placebo 0.48 (0.26, 0.87)<br>p = 0.016                        | OR (95% CI) for treatment vs. placebo 0.48 (0.26, 0.88)<br>p = 0.016                                       | OR (95% CI) for treatment vs. placebo 0.48 (0.26, 0.88)<br>p = 0.018                             | OR (95% CI) for treatment vs. placebo 0.45 (0.25, 0.81)<br>p = 0.008                           |
| % variability explained by $\Delta$ HHD (95% CI)                                                                                                           | 12.2 (0.8, 38.1)                                                                            | 1.8 (-9.3, 16.2)                                                                            | 13.9 (1.4, 42.9)                                                                            | 14.1 (1.5, 42.2)                                                                                           | 7.1 (-10.3, 45.0)                                                                                | 4.9 (-14.5, 24.7)                                                                              |

All models include adjustment for baseline hemodynamic value and study.  $\Delta$ RAP=change in right atrial pressure;  $\Delta$ mPAP=change in mean pulmonary artery pressure;  $\Delta$ CO=change in cardiac output;  $\Delta$ CI=change in cardiac index;  $\Delta$ PVR=change in pulmonary vascular resistance;  $\Delta$ PA compliance=change in pulmonary artery compliance;  $\Delta$ HHD=change in hemodynamic measure at 12 weeks as compared to baseline; OR=odds ratio; CI=confidence interval.

**Supplemental Table 2. Criteria to establish the change in a hemodynamic measure ( $\Delta$ HHD) as a mediator in the relationship between treatment assignment and clinical events at 12 weeks; in AIR study patients hemodynamics 60 minutes post-iloprost inhalation were used to calculate the change values.**

|                                                                                                                                                            | Hemodynamic measure                                                                          |                                                                                             |                                                                                             |                                                                                                            |                                                                                                  |                                                                                                |
|------------------------------------------------------------------------------------------------------------------------------------------------------------|----------------------------------------------------------------------------------------------|---------------------------------------------------------------------------------------------|---------------------------------------------------------------------------------------------|------------------------------------------------------------------------------------------------------------|--------------------------------------------------------------------------------------------------|------------------------------------------------------------------------------------------------|
|                                                                                                                                                            | $\Delta$ RAP                                                                                 | $\Delta$ mPAP                                                                               | $\Delta$ CO                                                                                 | $\Delta$ CI                                                                                                | $\Delta$ PVR                                                                                     | $\Delta$ PA Compliance                                                                         |
| 1. Treatment assignment has a significant effect on $\Delta$ HHD                                                                                           | Mean difference (95% CI) between treatment and placebo -1.2 mm Hg (-1.8, -0.61)<br>p = 0.020 | Mean difference (95% CI) between treatment and placebo -2.3 mm Hg (-3.3, -1.2)<br>p = 0.019 | Mean difference (95% CI) between treatment and placebo 0.37 L/min (0.24, 0.50)<br>p < 0.001 | Mean difference (95% CI) between treatment and placebo 0.22 L/min/m <sup>2</sup> (0.15, 0.29)<br>p < 0.001 | Mean difference (95% CI) between treatment and placebo -2.1 Wood units (-2.7, -1.5)<br>p < 0.001 | Mean difference (95% CI) between treatment and placebo 0.14 mL/mm Hg (0.08, 0.21)<br>p < 0.001 |
| 2. $\Delta$ HHD has a significant effect on the odds of a clinical event                                                                                   | OR (95% CI) per 1 mm Hg increase 1.04 (0.99, 1.09)<br>p = 0.107                              | OR (95% CI) per 1 mm Hg increase 1.01 (0.98, 1.04)<br>p = 0.381                             | OR (95% CI) per 1 L/min increase 0.69 (0.52, 0.92)<br>p = 0.010                             | OR (95% CI) per 1 L/min/m <sup>2</sup> unit increase 0.53 (0.32, 0.87)<br>p = 0.012                        | OR (95% CI) per 1 Wood unit increase 1.08 (1.03, 1.13)<br>p = 0.002                              | OR (95% CI) per 1 mL/mmHg increase 0.68 (0.22, 2.13)<br>p = 0.450                              |
| 3. Treatment assignment has a significant effect on the odds of a clinical event                                                                           | OR (95% CI) for treatment vs. placebo 0.43 (0.28, 0.66)<br>p < 0.001                         | OR (95% CI) for treatment vs. placebo 0.48 (0.31, 0.72)<br>p < 0.001                        | OR (95% CI) for treatment vs. placebo 0.48 (0.32, 0.74)<br>p < 0.001                        | OR (95% CI) for treatment vs. placebo 0.49 (0.32, 0.74)<br>p < 0.001                                       | OR (95% CI) for treatment vs. placebo 0.47 (0.30, 0.72)<br>p < 0.001                             | OR (95% CI) for treatment vs. placebo 0.48 (0.31, 0.73)<br>p < 0.001                           |
| 4. The effect of treatment assignment on the odds of a clinical event is attenuated with the addition of $\Delta$ HHD to the model (compare with #3 above) | OR (95% CI) for treatment vs. placebo 0.44 (0.29, 0.68)<br>p = 0.003                         | OR (95% CI) for treatment vs. placebo 0.48 (0.32, 0.73)<br>p < 0.001                        | OR (95% CI) for treatment vs. placebo 0.53 (0.34, 0.81)<br>p = 0.003                        | OR (95% CI) for treatment vs. placebo 0.53 (0.34, 0.82)<br>p = 0.004                                       | OR (95% CI) for treatment vs. placebo 0.53 (0.33, 0.82)<br>p = 0.005                             | OR (95% CI) for treatment vs. placebo 0.49 (0.32, 0.76)<br>p = 0.001                           |
| % variability explained by $\Delta$ HHD (95% CI)                                                                                                           | 3.8 (-2.1, 12.5)                                                                             | 1.8 (-3.6, 11.5)                                                                            | 11.9 (2.8, 38.0)                                                                            | 12.2 (2.5, 39.6)                                                                                           | 15.9 (4.0, 51.6)                                                                                 | 3.4 (-5.3, 15.8)                                                                               |

All models include adjustment for baseline hemodynamic value and study.  $\Delta$ RAP=change in right atrial pressure;  $\Delta$ mPAP=change in mean pulmonary artery pressure;  $\Delta$ CO=change in cardiac output;  $\Delta$ CI=change in cardiac index;  $\Delta$ PVR=change in pulmonary vascular resistance;  $\Delta$ PA compliance=change in pulmonary artery compliance;  $\Delta$ HHD=change in hemodynamic measure at 12 weeks as compared to baseline; OR=odds ratio; CI=confidence interval.
